# Supplementary material for: End of life care for infants, children and young people with life limiting conditions: summary of NICE guidance
Source: HighWire-hosted journal article supplement (doi:10.1136/bmj.i6385), 2016-12-08
Supplement: bmj.i6385.pdf [file bmj.i6385.pdf]

### 指南

## 婴幼儿、儿童和青少年终末期医疗照护:NICE 指南概要

### Guidelines

## End of life care for infants, children and young people with life limiting conditions: summary of NICE guidance

来源:BMJ 2016;355:i6385 doi: 10.1136/bmj.i6385

儿童和青少年会有多种临终状态,有时可能许多年生活在这种状态下。本指南建议,终末期医疗照护(又称为临终关怀或姑息治疗)应作为一个长期行动,在被诊断为已无多日时开始,并为未来规划。有时可能要在孩子出生前就开始规划。在现有条件下,它是儿童和青少年整体关怀的一部分,并且与其他积极治疗并行<sup>1</sup>。总之,它包含那些与死亡相关的临终关怀。

本指南制定的目的是规范处于临终状态下的婴儿、儿童和青少年的临终关怀,从而促进公平性和一致性。重要的主题涉及儿童和青少年以及他们的父母或照护人员如何照护他们,使得他们在期望的临终场所(很可能是家里)被照护的更好,并且优化白天和夜间的照护方案。

本文总结了近期英国国家卫生与临床优选研究所(NICE)有关计划和管理婴幼儿、儿童和青少年临终关怀的最新指南<sup>2</sup>。详细内容请参见图表。

### 建议

NICE 建议基于最佳可用证据的系统性综述,虽然多是低或充其量中等质量的证据,并明确考虑成本效益。当最小证据可以采纳时,建议基于指导委员会(GC)的关于“什么是良好实践”的经验和意见。

#### 如何制定照护计划

- 应当认识到临终状态的儿童和青少年生活以及他们的父母或照护者在决策制定和照护规划中具有核心作用。[基于非常低到中等质量的定性研究证据和GC的经验和意见]

### 你需要知道

- 涉及临终状态的儿童和青少年以及他们的父母或照护者决策制定和照护规划。
- 高级照护计划是儿童或年轻人临终关怀的核心要素。
- 要意识到其他家庭成员,如兄弟姐妹和祖父母,以及其他(如朋友、男朋友或女朋友)可能需要支持。
- 指定一位医学专家,负责指导和协调儿童或年轻人的照护。
- 治疗决策应该始终考虑什么是孩子的最佳利益。

- 应当向儿童和青少年以及他们的父母或照护者解释,他们对照护计划的决策是非常重要的,但是他们不需要单独做决定,多学科小组也会参与进来。[基于非常低到中等质量的定性研究证据和GC的经验和意见]

#### 高级照护计划

- 在适当的时间为每一个生命临终状态的儿童和青少年制定和记录一个兼顾现在和未来的高级照护计划(见框图1)。[基于非常低到中等质量的定性研究证据和GC的经验和意见]
- 在某些情况下应当在产前就开始计划。
- 与儿童或青少年及他们的父母或照护者(如适当)分享预先照护计划,并考虑那些涉及个体儿童或年轻人照护的专业人士和服务,也应该分享给他们,例如:
  - 全科医生

Gemma Villanueva, senior systematic reviewer<sup>1</sup>,  
M Stephen Murphy, clinical advisor<sup>1</sup>,  
David Vickers, chair of guideline committee, consultant paediatrician and medical director<sup>2,3</sup>,  
Emily Harrop, deputy chair of the guideline committee, consultant in paediatric palliative care<sup>4,5</sup>,  
Katharina Dworzynski, guideline lead<sup>1</sup>

<sup>1</sup>National Guideline Alliance, Royal College of Gynaecologists and Obstetricians, London NW1 4RG, UK

<sup>2</sup>Cambridgeshire Community Services NHS Trust, St Ives PE27 4LG, UK

<sup>3</sup>East Anglia's Children's Hospices, Milton CB24 6DF, UK

<sup>4</sup>Helen & Douglas House, Oxford OX4 1RW, UK

<sup>5</sup>Oxford University Hospitals, Oxford OX3 9DU, UK

Correspondence to: K Dworzynski kdworzynski@rcog.org.uk

孙靖译  
束永前校  
江苏省肿瘤医院  
肿瘤科

- 医院顾问
- 收容所
- 临托中心
- 照护服务(社区或专科)
- 学校及其他教育服务
- 救护车服务。

[基于非常低到中等质量的定性研究证据和GC的经验与意见]

### 多学科团队工作

- 根据儿童或青少年的需要,多学科小组可能包括:
  - 初级、次级或三级服务的医护人员
  - 包括孩子处于潜在临终状态时的专家、临终关怀专业人士、姑息治疗小组的专家成员(见NICE指南全文的建议1.5.4)
  - 社会保健医生
  - 教育专家
  - 牧师
  - 专职医疗人员(如物理治疗师、职业治疗师和心理治疗师)[根据GC的经验和意见]
- 每一个处于临终状态的儿童或青少年都应该有一位指定的医学专家,负责指导和协调患儿的照护工作。如果有必要或照护计划需要改变,他们向儿童或青少年及他们的父母或照护者解释他们所指定的医疗专家可能会改变。[根据GC的经验和意见]

### 情感和心理支持

- 定期与儿童和青少年及他们的父母或照护者讨论情绪和心理健康,特别是发生变化的时候,例如:
  - 当被诊断为临终状态

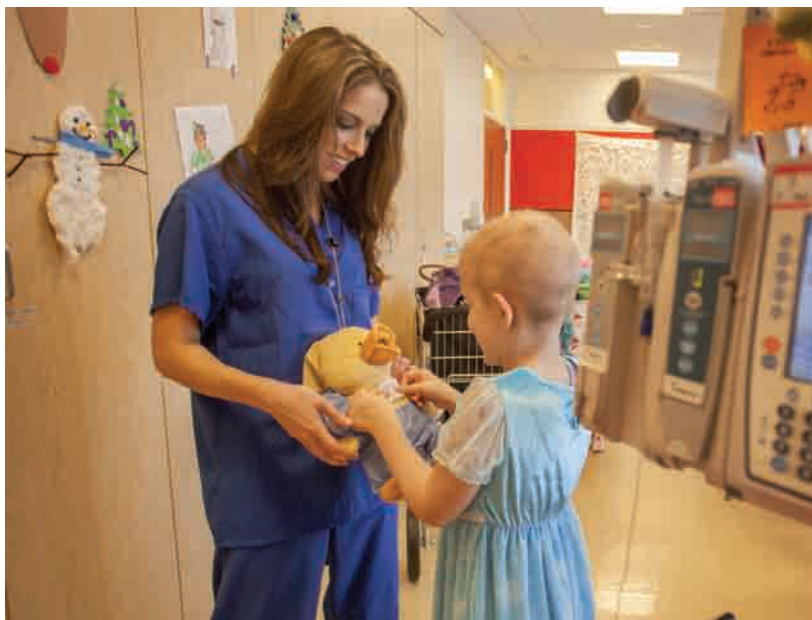

### 框图1 临终状态儿童或青少年高级照护计划的组成部分

- 儿童或青少年及其家庭的人口统计学信息
  - 更新联系信息:
    - 儿童或青少年的父母或照护者
    - 参与照护的主要专业人士
  - 主要决策人的知情同意声明
  - 临终状况的概要
  - 与儿童和青少年以及他们的父母或照护者达成共识的沟通和跟进方法
  - 儿童和青少年的生活抱负和愿望的概述,例如:
    - 家庭和其他关系
    - 社会活动和参与
    - 教育
    - 如何将他们的宗教、精神、文化信仰和价值观纳入他们的关怀
  - 与儿童或年轻人及其父母或照护者进行重大讨论的记录
  - 商定的治疗计划和目标
  - 相关的教育计划
  - 已经发生过的任何讨论和决定的记录:
    - 首选的照护场所和死亡地点
    - 器官和组织捐赠(见NICE指南<sup>2</sup>全文的建议1.1.19)
    - 管理危及生命的事件,包括复苏或生命支持计划
    - 具体的愿望,如葬礼安排和遗体处理
  - 高级照护计划的分配清单
- [根据指导委员会(GC)的意见和建议]

- 如果他们的临床状况恶化
    - 如果他们的个人情况发生变化
    - 如果他们的托儿所、中学或大学,或他们的工作发生了改变
    - 如果他们的临床照护发生了改变(例如,如果他们的照护从治疗病情变成了临终关怀)
- [根据GC的经验和意见]

### 社会实践支持

- 要知道其他家庭成员(如祖父母)和对孩子或青少年重要的人员(如朋友、男朋友或女朋友)可能需要支持,包括社会、实践、情感、心理和精神支持。[根据GC的经验和意见]
- 要知道他们的兄弟姐妹也需要支持,以应付:
  - 他们兄弟姐妹的病情和死亡

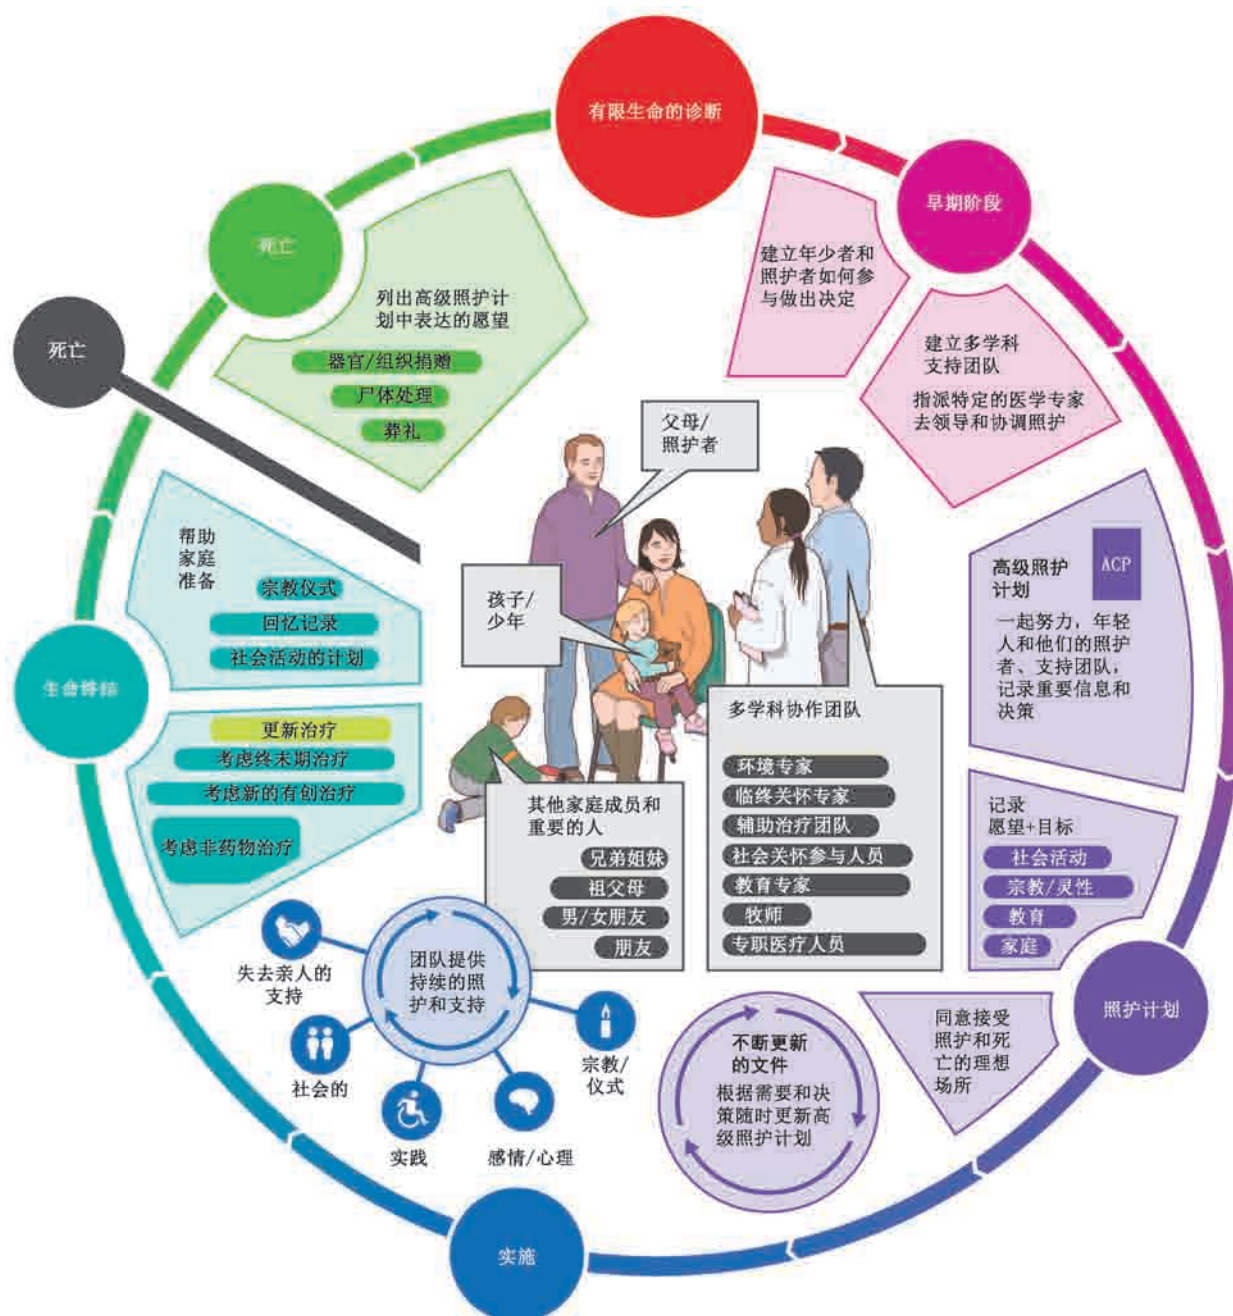

- 他们的父母或照护者的悲伤带来的影响  
[根据GC的经验和意见]
- 注意临终状态的儿童和青少年与他们的父母或照护者有不同的社会和实践支持的需求,这些需求可能会在临终进程中改变。他们可能包括:
  - 财务支持,如住房或适应家庭和设备的家庭药物输注
  - 实践支持,如获得临终照护
  - 技术支持,如培训和帮助在家里进行药物输注
  - 教育支持,如来自医院的学校服务
  - 经济支持

### 学以致用

- 在适当的时候,为您所照护的处于临终状态的儿童和青少年预先制定的照护计划是否被改进并记录?
- 是否有地方可以为接近生命尽头的儿童和青少年提供24小时照护服务?
- 患者和他们的家庭可以在他们心仪的地点被照护吗?
- 临终状态的儿童和青少年接受症状管理,可以最大限度地提高他们的生活质量吗?

## 患者如何参与本文创作?

患者没有直接参与这篇文章的创作。参与本指南制定的委员会成员包括2名患者代表,他们促成了建议的制定,并总结在这里。临终状态的儿童和青少年的意见为指南的制定提供了帮助,他们来自重点观察小组。

[基于非常低到中等质量的定性研究证据和GC的经验与意见]

### 接近生命的尽头

- 当一名儿童或青少年接近生命的终点时,与他们的父母或照护者商量有什么可以帮助他们,例如:
  - 重要的仪式
  - 记录或保存记忆(例如,照片、几缕头发或手印)
  - 计划社交媒体内容

[基于非常低到中等质量的定性研究证据和GC的经验与意见]

- 商定儿童和青少年及其父母或照护者的首选照护地点和死亡地点时,应考虑到:
  - 他们的愿望是个人的、独立的
  - 他们的宗教、精神和文化价值
  - 相关的和经验丰富的医疗保健专业人士的意见
  - 安全性和实用性

[根据GC的经验和意见]

- 解释照护地点或死亡地点可能改变,例如:
  - 如果儿童或青少年、他们的父母或照护者改变他们的想法或
  - 临床的原因或
  - 提供照护服务造成的问题

[基于非常低到中等质量的定性研究证据和GC的经验与意见]

- 对于那些正在接近生命的尽头并在家中被照护的处于临终状态的儿童和青少年,应提供的服务(需要时):
  - 在任何时间(白天和黑夜)儿科姑息治疗咨询顾问的建议(如通过电话)
  - 任何时候的儿科照护
  - 专家儿科姑息治疗团队医疗专业人士的家访(见NICE指南全文的建议1.5.4),例如,对症状进行管理
  - 包括氧气、肠内营养、皮下和静脉注射在内的干预措施和设备
  - 儿童和年轻人可能出现症状的预先处理方案。

[根据GC的经验和意见]

- 如果儿童或青少年在接近生命的尽头时有未解决的痛苦症状,则需要儿科姑息治疗专家小组会诊。[根据GC的经验和意见]
- 考虑非药物干预疼痛管理,如:

- 变化可能有助于他们放松,例如,环境调整(例如减少噪音)、音乐或身体接触(如触摸、握住或按摩)
- 疼痛部位的局部热或冷处理
- 安慰措施,如给新生儿蔗糖

[根据GC的经验和意见]

- 如果发生突然加重的疼痛,滴定治疗提供连续的基础镇痛,并规定附加剂量。
- 除了基础镇痛,在可预见的时间考虑给予儿童和青少年预期的镇痛剂量(例如,当改变敷料或移动和处理敷料时)。在计算所需的每日基础剂量时不包括预期剂量。

[根据GC的经验和意见]

- 当一个儿童和青少年接近生命的尽头时,与他们、他们的父母或照护者和相关的医疗专业人士讨论:
  - 任何对他们来说具有最佳疗效的可用的侵入性治疗
  - 他们目前正在接受的任何可能不再符合他们最佳利益的干预措施

[根据GC的经验和意见]

- 对生命有限的儿童和年轻人尝试复苏,除非提前有“不要尝试复苏”声明。[根据GC的经验和意见]

The members of the Guideline Committee were Amy Volans, Bobbie Farsides, Claire Wansley, David Vickers (chair), Elissa Coster (until September 2015), Emily Harrop (deputy chair from April 2016), Fauzia Paize (from May 2015), Jane Green, Karen Brombley, Lucy Coombes, Paul Nash, Peter Barry, Satbir Jassal, Sharon English (until March 2015), Stacey Curzon (from November 2015), and Zoe Picton-Howell. Co-opted members were Afia Manaf, David Hamilton, and Susan Lee.

The members of the National Guideline Alliance technical team were Alexandra Hellyer (from March 2016 to August 2016), Gemma Villanueva (from March 2015), Jessica Sims (until December 2014), Kate Coles (from December 2014 to March 2015), Katharina Dworzynski (from March 2015), Paul Jacklin, Rishiraj Caleyachetty (from December 2014 to March 2015), Sabrina Naqvi (from August 2016), Stephen Murphy, Timothy Reeves, and Yelan Guo.

贡献者(Contributors): All authors contributed to the initial draft of this article, helped revise the manuscript, and approved the final version for publication.

资助(Funding): The National Guideline Alliance was commissioned and funded by the National Institute for Health and Care Excellence to develop this guideline and write this BMJ summary.

利益竞争(Competing interests): We declare the following interests based on NICE's policy on conflicts of interests (available at [www.nice.org.uk/Media/Default/About/Who-we-are/Policies-and-procedures/code-of-practice-for-declaring-and-managing-conflicts-of-interest.pdf](http://www.nice.org.uk/Media/Default/About/Who-we-are/Policies-and-procedures/code-of-practice-for-declaring-and-managing-conflicts-of-interest.pdf)): authors' full statements can be viewed at [www.bmj.com/content/bmj/355/bmj.i6385/related#datasupp](http://www.bmj.com/content/bmj/355/bmj.i6385/related#datasupp).

### 参考文献

- 1 World Health Organization. Cancer pain relief and palliative care in children. WHO, 1998.
- 2 National Institute for Health and Care Excellence. End of life care for infants, children and young people with life-limiting conditions: planning and management (NICE guideline NG61). 2016. [www.nice.org.uk/guidance/NG61](http://www.nice.org.uk/guidance/NG61).

BMJ takes no responsibility for the accuracy of the translation from the published English language original and is not liable for any errors that may occur.

# BMJ
